# Supplementary material for: Review of ecotoxicological studies of widely used polystyrene nanoparticles
Source: Royal Society of Chemistry journal article supplement (doi:10.1039/d1em00375e), 2021-11-23
Supplement: d1em00375e1.pdf [file d1em00375e1.pdf]

## Supplementary Information

### Review of ecotoxicological studies of widely used polystyrene nanoparticles

Egle Kelpsiene<sup>1,3</sup>, Mikael T. Ekvall<sup>2,3</sup>, Martin Lundqvist<sup>1,3</sup>, Oscar Torstensson<sup>1</sup>, Jing Hua<sup>1</sup>  
and Tommy Cedervall<sup>1,3</sup>

<sup>1</sup> Department of Biochemistry and Structural Biology, Lund University, Lund University,  
P.O. Box 118, SE-221 00 Lund, Sweden

<sup>2</sup> Aquatic Ecology Unit, Department of Biology, Ecology Building, Lund University, SE-223  
62 Lund, Sweden

<sup>3</sup> NanoLund, Lund University, Box 118, SE-221 00 Lund, Sweden

\*Corresponding author. e-mail: [egle.kelpsiene@biochemistry.lu.se](mailto:egle.kelpsiene@biochemistry.lu.se)

#### List of abbreviations

SDS – Sodium dodecyl sulfate

EC<sub>50</sub> - half maximal effective concentration

PTA/NTA – Particle tracking analysis or nanoparticle tracking analysis

DLS – Dynamic light scattering

SLS – Static light scattering

ELS – Electrophoretic light scattering

TEM – Transmission electron microscopy

SEM - Scanning electron microscope

DCS – Differential centrifugal sedimentation

UV-vis – Ultraviolet visible spectroscopy

SAXS – Small-angle x-ray scattering

| Table S1. The information extracted from the reviewed published papers. “hpf” stands for hours post fertilization. |                                                                                                                                            |                                                     |                                                                                 |                                                     |                   |                                                                               |                                                                              |                                                                                           |                                                    |              |
|--------------------------------------------------------------------------------------------------------------------|--------------------------------------------------------------------------------------------------------------------------------------------|-----------------------------------------------------|---------------------------------------------------------------------------------|-----------------------------------------------------|-------------------|-------------------------------------------------------------------------------|------------------------------------------------------------------------------|-------------------------------------------------------------------------------------------|----------------------------------------------------|--------------|
| Study subject                                                                                                      | Polystyrene nanoparticles size (nm)                                                                                                        |                                                     | Concentration (mg/L; unless stated differently)                                 |                                                     | Exposure duration | If and how polystyrene nanoparticle suspension were cleaned?                  | Other measured parameters of the test media and/or polystyrene nanoparticles | The main outcome                                                                          | Polystyrene nanoparticles supplier                 | Ref.         |
|                                                                                                                    | Before adding to the test media, detection method(s) performed in the pure water, unless stated differently, particle surface modification | After adding to the test media, detection method(s) | Before and after adding to the test media; (nominal, unless stated differently) | After adding to the test media, detection method(s) |                   |                                                                               |                                                                              |                                                                                           |                                                    |              |
| <i>Daphnia magna</i>                                                                                               | 70 TEM, surface modification not specified                                                                                                 | Not mentioned                                       | 0.22 – 150                                                                      | Not mentioned                                       | 21 d              | No, because sodium dodecyl sulfate concentration was below toxicity threshold | pH; Temperature; Light-dark period; Oxygen concentration; Conductivity       | Reduction in body size and neonates at 0.22 mg/L; Malformations at 30 mg/L                | Synthesized at AVT-PCC, Wageningen UR              | <sup>1</sup> |
| <i>D. magna</i>                                                                                                    | 100 DLS, -NH <sub>2</sub>                                                                                                                  | 150-250, DLS                                        | 0.1 – 1000                                                                      | Not mentioned                                       | 24 h              | No comments                                                                   | pH; Temperature                                                              | Increased mortality at 1 mg/L                                                             | Obtained from a previous FP7 project (QualityNano) | <sup>2</sup> |
| <i>D. magna</i>                                                                                                    | 26 DLS, ELS, SEM, -COOH                                                                                                                    | 347 and 436, DLS, ELS                               | 0.0001 – 100                                                                    | Yes (SLS)                                           | 48 h              | Dialysis (a comparison between dialysed and non-dialysed nanoparticles)       | pH; ζ-potential; Conductivity;                                               | Increased mortality at >100 mg/L; Increased mortality at EC <sub>50</sub> = 22.0±0.7 mg/L | Bangs Laboratories, Inc., US                       | <sup>3</sup> |

|                 |                                                             |                          |                                              |               |                |                                                                                     |                                                                                              |                                                                                                                                |                                                    |              |
|-----------------|-------------------------------------------------------------|--------------------------|----------------------------------------------|---------------|----------------|-------------------------------------------------------------------------------------|----------------------------------------------------------------------------------------------|--------------------------------------------------------------------------------------------------------------------------------|----------------------------------------------------|--------------|
| <i>D. magna</i> | 100<br>DLS, ELS,<br>SEM, -COOH                              | 95, DLS, ELS             | 0.01 – 100                                   | Yes (SLS)     | 48 h           | Dialysis (a<br>comparison<br>between dialysed<br>and non-dialysed<br>nanoparticles) | pH;<br>ζ-potential;<br>Conductivity                                                          | Increased<br>mortality at >100<br>mg/L;<br>Increased<br>mortality at EC <sub>50</sub><br>= 13.0±1.4 mg/L                       | Bangs<br>Laboratories,<br>Inc., US                 | <sup>3</sup> |
| <i>D. magna</i> | 50-100, 110 and<br>300<br>DLS, -NH <sub>2</sub>             | 110, 370 and<br>360, DLS | 1, 40, 70, 75, 100                           | Not mentioned | 48 h           | No comments                                                                         | pH;<br>ζ-potential;<br>Temperature;<br>Light-dark period;<br>Dissolved<br>oxygen;<br>Ammonia | Increased<br>mortality at LC <sub>50</sub><br>= 5.24 mg/L;<br>Behavioural<br>changes and<br>elevated rates at<br>ROS at 1 mg/L | Aladdin;<br>Thermo<br>Scientific,<br>China         | <sup>4</sup> |
| <i>D. magna</i> | 50<br>DLS, NTA,<br>DCS, -NH <sub>2</sub>                    | 120-150, NTA             | 1.4 and 2.7                                  | Not mentioned | 24 and<br>48 h | Dialysis                                                                            | pH;<br>Temperature;<br>Light-dark period;<br>Turbidity                                       | Increased<br>mortality at 1.4<br>mg/L                                                                                          | Bangs<br>Laboratories,<br>Inc., US                 | <sup>5</sup> |
| <i>D. magna</i> | 26, 53, 62<br>DLS, -NH <sub>2</sub> , -<br>COOH             | Not mentioned            | 0.0032, 0.032,<br>0.32, 0.76, 3.2,<br>7.6    | Not mentioned | 103 d          | Dialysis                                                                            | pH;<br>Temperature;<br>Light-dark period;<br>Sedimentation                                   | Increased<br>mortality at 0.32<br>mg/L                                                                                         | Bangs<br>Laboratories,<br>Inc., US                 | <sup>6</sup> |
| <i>D. magna</i> | 52<br>DLS, -NH <sub>2</sub>                                 | Not mentioned            | 25 – 150                                     | Not mentioned | 24 h           | Dialysis                                                                            | Not mentioned                                                                                | Increased<br>mortality at >75<br>mg/L                                                                                          | Bangs<br>Laboratories,<br>Inc., US                 | <sup>7</sup> |
| <i>D. magna</i> | 130-150,<br>surface<br>modification not<br>specified        | 130-150, DLS             | 0.30, 0.51 0.60,<br>1.20, 2.40, 4.80<br>mmol | Not mentioned | 48 h           | No comments                                                                         | pH;<br>ζ-potential                                                                           | A 2-fold<br>reduction in the<br>acute toxicity<br>after nanoplastics<br>sonication process                                     | Synthesized<br>by authors                          | <sup>8</sup> |
| <i>D. pulex</i> | 75<br>DLS, TEM,<br>surface<br>modification not<br>specified | 71, DLS, TEM             | 0.1, 1, 10, 50,<br>100, 150, 200,<br>400     | Not mentioned | 48 and<br>96 h | No comments                                                                         | ζ-potential;<br>Temperature;<br>Light-dark period;<br>Dissolved oxygen                       | Increased<br>mortality at LC <sub>50</sub><br>= 80.02 mg/L;<br>Changes in gene<br>expression at 0.1<br>mg/L                    | BaseLine<br>Chromtech<br>Research<br>Centre, China | <sup>9</sup> |

|                 |                                                             |              |                                                  |               |               |                                                                  |                                                                          |                                                                                                                                               |                                                    |               |
|-----------------|-------------------------------------------------------------|--------------|--------------------------------------------------|---------------|---------------|------------------------------------------------------------------|--------------------------------------------------------------------------|-----------------------------------------------------------------------------------------------------------------------------------------------|----------------------------------------------------|---------------|
| <i>D. pulex</i> | 75<br>DLS, TEM,<br>surface<br>modification not<br>specified | 71, DLS, TEM | 0.1, 0.5, 1, 2                                   | Not mentioned | 21 d          | Centrifugation<br>followed by<br>washing with<br>ultrapure water | Temperature;<br>Light-dark period;<br>Dissolved oxygen                   | Changes in genes<br>expression at 0.5<br>mg/L                                                                                                 | BaseLine<br>Chromtech<br>Research<br>Centre, China | <sup>10</sup> |
| <i>D. pulex</i> | 75<br>DLS, surface<br>modification not<br>specified         | 71, DLS      | 0.1, 0.5, 1, 2, 10,<br>50, 100, 150, 200,<br>400 | Not mentioned | 48 h,<br>21 d | No comments                                                      | nPS structure;<br>Temperature;<br>Light-dark period;<br>Dissolved oxygen | Increased<br>mortality at LC <sub>50</sub><br>= 76.69 mg/L;<br>Growth inhibition<br>at 0.5 mg/L;<br>Reproduction<br>impairment at 0.1<br>mg/L | BaseLine<br>Chromtech<br>Research<br>Centre, China | <sup>11</sup> |
| <i>D. pulex</i> | 75<br>DLS, TEM,<br>surface<br>modification not<br>specified | 71, DLS      | 0.1, 0.5, 1, 2                                   | Not mentioned | 21 d          | No comments                                                      | Temperature;<br>Light-dark period                                        | Changes in genes<br>expression at 2<br>mg/L                                                                                                   | BaseLine<br>Chromtech<br>Research<br>Centre, China | <sup>12</sup> |
| <i>D. pulex</i> | 75<br>DLS, TEM,<br>surface<br>modification not<br>specified | 71, DLS      | 0.1                                              | Not mentioned | 21 d          | No comments                                                      | Temperature;<br>Light-dark period                                        | Reproduction<br>impairment and<br>growth inhibition                                                                                           | BaseLine<br>Chromtech<br>Research<br>Centre, China | <sup>13</sup> |
| <i>D. pulex</i> | 75<br>DLS, TEM,<br>surface<br>modification not<br>specified | 71, DLS      | 1                                                | Not mentioned | 21 d          | No comments                                                      | ζ-potential;<br>Temperature;<br>Light-dark period;<br>Dissolved oxygen   | Changes in genes<br>expression                                                                                                                | BaseLine<br>Chromtech<br>Research<br>Centre, China | <sup>14</sup> |
| <i>D. pulex</i> | 75<br>DLS, TEM,<br>surface<br>modification not<br>specified | 71, DLS      | 1                                                | Not mentioned | 96 h          | No comments                                                      | Temperature;<br>Light-dark period                                        | Changes in genes<br>expression                                                                                                                | BaseLine<br>Chromtech<br>Research<br>Centre, China | <sup>15</sup> |
| <i>D. pulex</i> | 75<br>DLS, TEM,<br>surface                                  | 71, DLS      | 0.001, 0.1, 0.5, 1,<br>2                         | Not mentioned | 21 d          | No comments                                                      | Temperature;<br>Light-dark period                                        | Changes in genes<br>expression                                                                                                                | BaseLine<br>Chromtech<br>Research                  | <sup>16</sup> |

|                                                   |                                                    |                 |                      |               |              |                                                                     |                                                                                               |                                                                               |                                           |               |
|---------------------------------------------------|----------------------------------------------------|-----------------|----------------------|---------------|--------------|---------------------------------------------------------------------|-----------------------------------------------------------------------------------------------|-------------------------------------------------------------------------------|-------------------------------------------|---------------|
|                                                   | modification not specified                         |                 |                      |               |              |                                                                     |                                                                                               |                                                                               | Centre, China                             |               |
| <i>D. pulex</i>                                   | 71.18 DLS, TEM, surface modification not specified | 71, 18 DLS      | 0.1, 0.5, 1, 2       | Not mentioned | 21 d         | No, because sodium azide concentration was below toxicity threshold | Temperature; Light-dark period                                                                | Inhibition of fecundity and population growth; Changes in proteins expression | BaseLine Chromtech Research Centre, China | <sup>17</sup> |
| <i>Carassius carassius</i> (size is not provided) | 24 DLS, surface modification not specified         | Not mentioned   | 100                  | Not mentioned | 42 d         | Dialysis                                                            | Temperature; Light-dark period                                                                | Changes in metabolism and behaviour                                           | Bangs Laboratories, Inc., US              | <sup>18</sup> |
| <i>C. carassius</i> (8.2–9.6 cm, 7.5–13.7 g)      | 24 and 27 DLS, NTA, -SO <sub>3</sub> H             | Not mentioned   | 71.35                | Not mentioned | 61 d         | Dialysis                                                            | Temperature; Light-dark period                                                                | Changes in metabolism and behaviour                                           | Bangs Laboratories, Inc., US              | <sup>19</sup> |
| <i>C. carassius</i> (size is not provided)        | 52 and 180 DLS, -NH <sub>2</sub>                   | 56 and 174, DLS | 29 – 100             | Not mentioned | 67 d         | Dialysis                                                            | Not mentioned                                                                                 | Changes in behaviour                                                          | Bangs Laboratories, Inc., US              | <sup>7</sup>  |
| <i>Danio rerio</i> (3–4 months old)               | 45 DLS, surface modification not specified         | 30.67±8.97, DLS | 0.05                 | Not mentioned | 7 d          | Centrifugation followed by washing with ultrapure water             | ζ-potential; pH; Temperature; Light-dark period                                               | Changes in oxygen consumption and elevated heart rate                         | Bangs Laboratories, Inc., US              | <sup>20</sup> |
| <i>D. rerio</i> (embryo; 0, 24, 48 and 72 hpf)    | 100 SEM, surface modification not specified        | Not mentioned   | 2.2x10 <sup>-7</sup> | Not mentioned | 72 h         | Centrifugation followed by washing with ultrapure water             | Temperature; Light-dark period                                                                | Elevated heart rate and blood flow, changes in development                    | Bangs Laboratories, Inc., US              | <sup>21</sup> |
| <i>D. rerio</i> (adults, ~6 months old)           | 70 TEM, surface modification not specified         | Not mentioned   | 0.5, 1.5, 5          | Not mentioned | 7 d, 7 weeks | No comments                                                         | pH; Temperature; Light-dark period; Dissolved oxygen; Electrical conductivity; Water hardness | Changes in the activity of the nervous system at 1.5 and 5 mg/L               | BaseLine ChromTech Research Centre, China | <sup>22</sup> |

|                                                    |                                                                                    |                      |                                     |               |               |             |                                                                            |                                                                                                                |                                    |               |
|----------------------------------------------------|------------------------------------------------------------------------------------|----------------------|-------------------------------------|---------------|---------------|-------------|----------------------------------------------------------------------------|----------------------------------------------------------------------------------------------------------------|------------------------------------|---------------|
| <i>D. rerio</i><br>(larvae, 3 hpf)                 | 50<br>TEM, surface<br>modification not<br>specified                                | Not mentioned        | 1                                   | Not mentioned | 48 h, 72<br>h | No comments | ζ-potential;<br>Temperature                                                | Inhibition of the<br>larval locomotion;<br>Reduced body<br>length of larvae;<br>Changes in genes<br>expression | Polysciences<br>Co., US            | <sup>23</sup> |
| <i>D. rerio</i><br>(larvae, 72,<br>96, or 120 hpf) | 50<br>DLS, SEM,<br>TEM, surface<br>modification not<br>specified                   | 50, DLS, SEM,<br>TEM | 10                                  | Not mentioned | 24 h          | No comments | ζ-potential;<br>pH;<br>nPS structure;<br>Light-dark period;<br>Temperature | Accumulation in<br>the cytoplasm;<br>Changes in genes<br>expression                                            | Polyscience,<br>Inc., US           | <sup>24</sup> |
| <i>D. rerio</i><br>(adult, 6<br>months old)        | 42<br>Methodology is<br>not mentioned,<br>surface<br>modification not<br>specified | Not mentioned        | 1x10 <sup>-4</sup> , 0.001,<br>0.01 | Not mentioned | 5 d           | No comments | Not mentioned                                                              | Decreased heart<br>rate and<br>locomotor activity                                                              | Bangs<br>Laboratories,<br>Inc., US | <sup>25</sup> |

## References

1. E. Besseling, B. Wang, M. Lüring and A. A. Koelmans, Nanoplastic Affects Growth of *S. obliquus* and Reproduction of *D. magna*, *Environmental Science & Technology*, 2014, **48**, 12336-12343.
2. F. Nasser and I. Lynch, Secreted protein eco-corona mediates uptake and impacts of polystyrene nanoparticles on *Daphnia magna*, *Journal of Proteomics*, 2016, **137**, 45-51.
3. M. Heinlaan, K. Kasemets, V. Aruoja, I. Blinova, O. Bondarenko, A. Lukjanova, A. Khosrovyan, I. Kurvet, M. Pullerits, M. Sihtmäe, G. Vasiliev, H. Vija and A. Kahru, Hazard evaluation of polystyrene nanoplastic with nine bioassays did not show particle-specific acute toxicity, *Science of The Total Environment*, 2020, **707**, 136073.
4. W. Lin, R. Jiang, S. Hu, X. Xiao, J. Wu, S. Wei, Y. Xiong and G. Ouyang, Investigating the toxicities of different functionalized polystyrene nanoplastics on *Daphnia magna*, *Ecotoxicol Environ Saf*, 2019, **180**, 509-516.
5. R. Frankel, M. T. Ekvall, E. Kelpsiene, L.-A. Hansson and T. Cedervall, Controlled protein mediated aggregation of polystyrene nanoplastics does not reduce toxicity towards *Daphnia magna*, *Environmental Science: Nano*, 2020, DOI: 10.1039/C9EN01236B.



6. E. Kelpsiene, O. Torstensson, M. T. Ekvall, L.-A. Hansson and T. Cedervall, Long-term exposure to nanoplastics reduces life-time in *Daphnia magna*, *Scientific Reports*, 2020, **10**, 5979.
7. K. Mattsson, E. V. Johnson, A. Malmendal, S. Linse, L.-A. Hansson and T. Cedervall, Brain damage and behavioural disorders in fish induced by plastic nanoparticles delivered through the food chain, *Scientific Reports*, 2017, **7**, 11452.
8. V. P. Vaz, D. J. Nogueira, D. S. Vicentini and W. G. Matias, Can the sonication of polystyrene nanoparticles alter the acute toxicity and swimming behavior results for *Daphnia magna*?, *Environmental Science and Pollution Research*, 2021, **28**, 14192-14198.
9. Z. Liu, M. Cai, P. Yu, M. Chen, D. Wu, M. Zhang and Y. Zhao, Age-dependent survival, stress defense, and AMPK in *Daphnia pulex* after short-term exposure to a polystyrene nanoplastic, *Aquatic Toxicology*, 2018, **204**, 1-8.
10. D. Wu, Z. Liu, M. Cai, Y. Jiao, Y. Li, Q. Chen and Y. Zhao, Molecular characterisation of cytochrome P450 enzymes in waterflea (*Daphnia pulex*) and their expression regulation by polystyrene nanoplastics, *Aquatic Toxicology*, 2019, **217**, 105350.
11. Z. Liu, P. Yu, M. Cai, D. Wu, M. Zhang, Y. Huang and Y. Zhao, Polystyrene nanoplastic exposure induces immobilization, reproduction, and stress defense in the freshwater cladoceran *Daphnia pulex*, *Chemosphere*, 2019, **215**, 74-81.

12. Z. Liu, Y. Huang, Y. Jiao, Q. Chen, D. Wu, P. Yu, Y. Li, M. Cai and Y. Zhao, Polystyrene nanoplastic induces ROS production and affects the MAPK-HIF-1/NFkB-mediated antioxidant system in *Daphnia pulex*, *Aquatic Toxicology*, 2020, **220**, 105420.
13. Z. Liu, M. Cai, D. Wu, P. Yu, Y. Jiao, Q. Jiang and Y. Zhao, Effects of nanoplastics at predicted environmental concentration on *Daphnia pulex* after exposure through multiple generations, *Environmental Pollution*, 2020, **256**, 113506.
14. W. Zhang, Z. Liu, S. Tang, D. Li, Q. Jiang and T. Zhang, Transcriptional response provides insights into the effect of chronic polystyrene nanoplastic exposure on *Daphnia pulex*, *Chemosphere*, 2020, **238**, 124563.
15. Z. Liu, Y. Li, E. Pérez, Q. Jiang, Q. Chen, Y. Jiao, Y. Huang, Y. Yang and Y. Zhao, Polystyrene nanoplastic induces oxidative stress, immune defense, and glycometabolism change in *Daphnia pulex*: Application of transcriptome profiling in risk assessment of nanoplastics, *Journal of Hazardous Materials*, 2021, **402**, 123778.
16. Z. Liu, Y. Jiao, Q. Chen, Y. Li, J. Tian, Y. Huang, M. Cai, D. Wu and Y. Zhao, Two sigma and two mu class genes of glutathione S-transferase in the waterflea *Daphnia pulex*: Molecular characterization and transcriptional response to nanoplastic exposure, *Chemosphere*, 2020, **248**, 126065.

17. Z. Liu, Y. Li, M. S. Sepúlveda, Q. Jiang, Y. Jiao, Q. Chen, Y. Huang, J. Tian and Y. Zhao, Development of an adverse outcome pathway for nanoplastic toxicity in *Daphnia pulex* using proteomics, *Science of The Total Environment*, 2020, 144249.
18. T. Cedervall, L.-A. Hansson, M. Lard, B. Frohm and S. Linse, Food Chain Transport of Nanoparticles Affects Behaviour and Fat Metabolism in Fish, *PLOS ONE*, 2012, **7**, e32254.
19. K. Mattsson, M. T. Ekvall, L.-A. Hansson, S. Linse, A. Malmendal and T. Cedervall, Altered Behavior, Physiology, and Metabolism in Fish Exposed to Polystyrene Nanoparticles, *Environmental Science & Technology*, 2015, **49**, 553-561.
20. J. A. Pitt, R. Trevisan, A. Massarsky, J. S. Kozal, E. D. Levin and R. T. Di Giulio, Maternal transfer of nanoplastics to offspring in zebrafish (*Danio rerio*): A case study with nanopolystyrene, *Science of The Total Environment*, 2018, **643**, 324-334.
21. Z. Duan, X. Duan, S. Zhao, X. Wang, J. Wang, Y. Liu, Y. Peng, Z. Gong and L. Wang, Barrier function of zebrafish embryonic chorions against microplastics and nanoplastics and its impact on embryo development, *Journal of Hazardous Materials*, 2020, **395**, 122621.
22. S. Sarasamma, G. Audira, P. Siregar, N. Malhotra, Y. H. Lai, S. T. Liang, J. R. Chen, K. H. Chen and C. D. Hsiao, Nanoplastics Cause Neurobehavioral Impairments, Reproductive and Oxidative Damages, and Biomarker Responses in Zebrafish:

- Throwing up Alarms of Wide Spread Health Risk of Exposure, *International journal of molecular sciences*, 2020, **21**.
23. Q. Chen, M. Gundlach, S. Yang, J. Jiang, M. Velki, D. Yin and H. Hollert, Quantitative investigation of the mechanisms of microplastics and nanoplastics toward zebrafish larvae locomotor activity, *Science of the total environment*, 2017, **584**, 1022-1031.
24. M. Sendra, P. Pereiro, M. P. Yeste, L. Mercado, A. Figueras and B. Novoa, Size matters: Zebrafish (*Danio rerio*) as a model to study toxicity of nanoplastics from cells to the whole organism, *Environmental Pollution*, 2020, **268**, 115769.
25. Q. Hu, H. Wang, C. He, Y. Jin and Z. Fu, Polystyrene nanoparticles trigger the activation of p38 MAPK and apoptosis via inducing oxidative stress in zebrafish and macrophage cells, *Environmental Pollution*, 2020, **269**, 116075.
